# Supplementary material
Source: PubMed Central journal article supplement (PMC3048460)

### A. Locomotor Activity

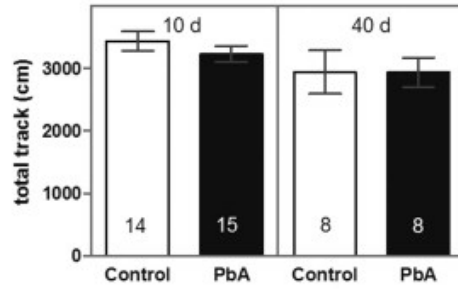

### B. Exploration

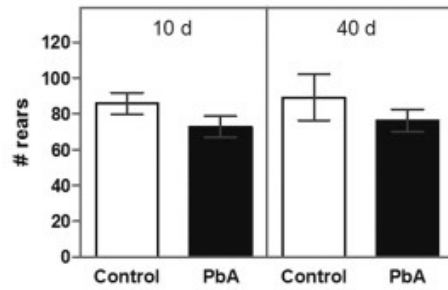

### C. Thigmotaxis

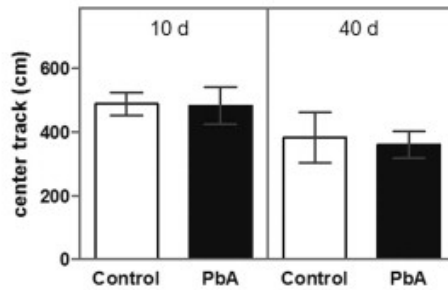

### Object Exploration

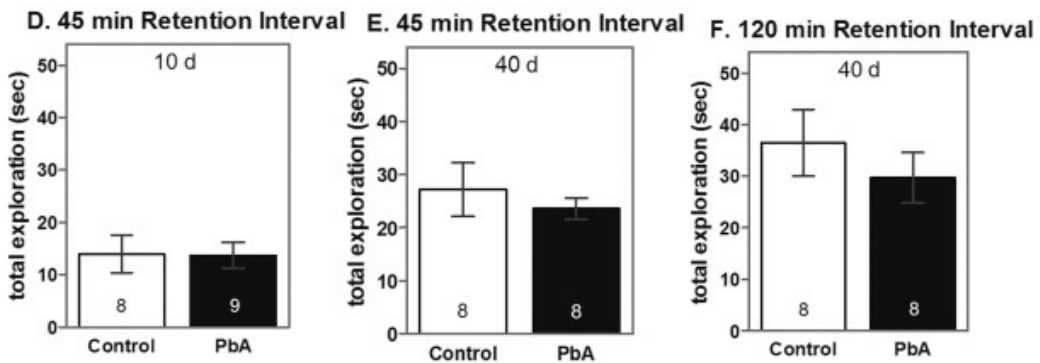

Supplement: NIHMS264224-supplement-Figure.pdf [file NIHMS264224-supplement-Figure.pdf]
